# Supplementary material
Source: Elsevier journal article supplement (https://www.sciencedirect.com/science/article/pii/S2603647919300235)
Supplement: mmc1 [file S2603647919300235:mmc1.docx]

ANEXO: **ESCALA HUMANIZAR BREVE (EH-b)**

Este cuestionario es anónimo y confidencial, sólo le tomará unos minutos, no hay respuestas correctas o incorrectas, el objetivo es valorar el sentido que puede tener para Ud. el sufrimiento.

A continuación encontrará afirmaciones en las que deberá puntuar del 1 al 5 dependiendo de su grado de acuerdo y teniendo en cuenta la clave:

| 1 = Totalmente  en desacuerdo | 2 = En desacuerdo | 3= Indiferente | 4 = De acuerdo | 5 = Totalmente  de acuerdo |
| --- | --- | --- | --- | --- |

| *Marque con una X según su nivel de acuerdo…* | **1** | **2** | **3** | **4** | **5** |
| --- | --- | --- | --- | --- | --- |
| 1. Sufrir puede ser algo trascendental puede llevar a una vida nueva | 1 | 2 | 3 | 4 | 5 |
| 2. El ser humano debe pagar por sus actos irresponsables, por eso sufre | 1 | 2 | 3 | 4 | 5 |
| 3. El sufrimiento es consecuencia de las acciones malas que se han cometido en la vida | 1 | 2 | 3 | 4 | 5 |
| 4. El sufrimiento es necesario para aprender | 1 | 2 | 3 | 4 | 5 |
| 5. El sufrimiento es un obstáculo a vencer y así lograr la paz interior | 1 | 2 | 3 | 4 | 5 |
| 6. El origen del sufrimiento es el deseo, el egoísmo | 1 | 2 | 3 | 4 | 5 |
| 7. El sufrimiento es una señal de que uno debería cambiar algo | 1 | 2 | 3 | 4 | 5 |
| 8. El sufrimiento está íntimamente ligado al amor | 1 | 2 | 3 | 4 | 5 |
| 9. El sufrimiento llega debido a la oposición o alejamiento de lo Divino | 1 | 2 | 3 | 4 | 5 |
| 10. El sufrimiento se debe a la no aceptación del dolor, a la lucha interna | 1 | 2 | 3 | 4 | 5 |
| 11. La experiencia de sufrimiento sirve para cambiar la manera de ver la vida | 1 | 2 | 3 | 4 | 5 |
| 12. Lo provocan los ancestros que ofendidos por los delitos cometidos o faltas morales | 1 | 2 | 3 | 4 | 5 |
| 13. El sufrimiento es una fuente de energía para buscar lo que te falta | 1 | 2 | 3 | 4 | 5 |
| 14. Ya que existe una cantidad de sufrimiento, si yo cojo mi parte al resto le queda menos | 1 | 2 | 3 | 4 | 5 |

Puntuación obtenida:

**Sentido del sufrimiento como Cambio:** ítems 1, 4, 5, 7, 8, 10, 11, 13. Cuanto mayor es la suma de las puntuaciones obtenida en estos ítems, más sentido o utilidad se le otorga al sufrimiento como palanca o motor de cambio positivo. Puede ser como experiencia de trascendencia o como energía necesaria que moviliza una búsqueda personal y que lleve a un crecimiento interior o a una vida nueva.

**Sentido del sufrimiento como Carga:** ítems 2, 3, 6, 9, 12, 14. Cuanto mayor es la suma de las puntuaciones obtenida en estos ítems más sentido se le dota a sobrellevar la carga que supone el sufrimiento. La utilidad estaría en la aceptación de la carga como sacrificio o esfuerzo, dado el reconocimiento que se hace que el sufrimiento es consecuencia de los actos irresponsables, malas acciones cometidas, faltas morales, deseo, egoísmo o alejamiento de lo Divino. También recoge un sentido solidario de aceptación de una carga compartida con el mundo “si yo cojo mi parte al resto le queda menos”.
